# Supplementary material
Source: publisher figshare collection journal article supplement (https://sage.figshare.com/ndownloader/files/17947787)
Supplement: Supplementary file 1 [file 17947787]

    ## WinBUGS code   
    # J = # of Congresses
    # N = # of observations
    
    model {
    for (i in 1:N){
        FP_position[i] ~ dnorm(mu.y[i], tau.y)
        mu.y[i] <- alpha[time[i]] + 
                   beta[1,time[i]]*female[i] + 
                   beta[2,time[i]]*Dem[i] + 
                   beta[3,time[i]]*SFRC[i] + 
                   beta[4,time[i]]*SASC[i] +
                   beta[5,time[i]]*veteran[i] 
        }

        # priors
        for (i in 1:n.beta){
        for (k in 1:J){
        beta[i,k] ~ dnorm(0, 0.1)
        }}
        tau.y <- pow(sigma.y, -2)
        sigma.y ~ dunif(0, 100)
        
        for (j in 1:J){
        alpha[j] ~ dnorm(0, tau.alpha)
        }
        tau.alpha <- pow(sigma.alpha, -2)
        sigma.alpha ~ dunif(0, 100)
    }
